# Supplementary material for: Orchestrated positioning of post-transcriptional modifications at the branch point recognition region of U2 snRNA
Source: PubMed Central journal article supplement — RNA. 2018 Jan;24(1):30–42. doi: 10.1261/rna.063842.117 (PMC5733568; doi:10.1261/rna.063842.117), 2018-01
Supplement: supp_063842.117_Supplemental_Figure_S2.pdf [file supp_063842.117_Supplemental_Figure_S2.pdf]

**human U85**

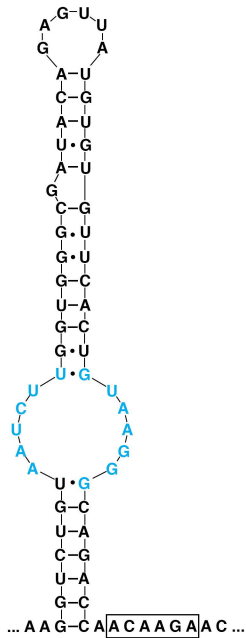

**CmΨ**

***Xenopus* U85 (1)**

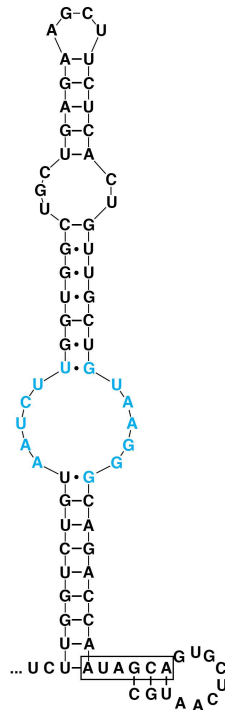

**CmU**

***Xenopus* U85 (2)**

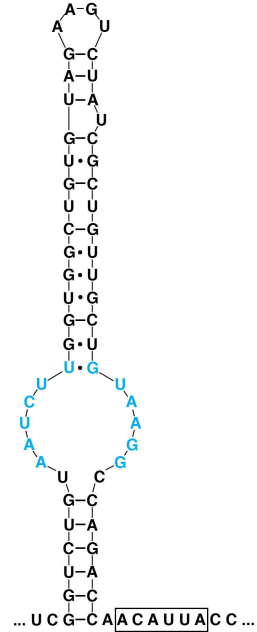

**CmΨ**

**Supplemental Figure S2.**

Predicted secondary structure of one human and two *Xenopus* U85/ SCARNA10 domains that contain U5-Ψ46 pseudouridylation pockets (blue nucleotides). Detected pseudouridylation activity is indicated below each scheme.
